# Supplementary material
Source: HighWire-hosted journal article supplement (https://www.ajevonline.org/highwire/filestream/12329/field_highwire_adjunct_files/0/SupplementalData.pdf)
Supplement: SupplementalData.pdf [file SupplementalData.pdf]

**Supplemental Data for:**

Walker HV, Jones JE, Swarts ND and Kerslake F. 2021.

Manipulating nitrogen and water resources for improved cool climate vine to wine quality. *Am J Enol Vitic* 73:11-25. doi: 10.5344/ajev.2021.21004.**Supplemental Table 1** Climate data grouped by phenological stages (dormancy to budbreak [1 May to 31 Aug], budbreak to bloom [1 Sept to 31 Nov], bloom to veraison [1 Dec to 31 Jan], and veraison to harvest [1 Feb to 30 April]) from an on-site weather station at the trial site for the 2016/17, 2017/18, and 2018/19 growing seasons (May to April) with historical average climate data (1991 to 2020) obtained from Hobart Airport weather station.

|                             |                   | Average daily temperature (°C) | Maximum temperature (°C) | Minimum temperature (°C) | Solar radiation (MJ/m <sup>2</sup> ) | Rainfall (mm) | Rainfall (L/vine) | Irrigation (L/vine) |            |
|-----------------------------|-------------------|--------------------------------|--------------------------|--------------------------|--------------------------------------|---------------|-------------------|---------------------|------------|
|                             |                   |                                |                          |                          |                                      |               |                   | Chardonnay          | Pinot noir |
| <b>Dormancy to budbreak</b> | <b>2016/17</b>    | 10.2                           | 13.6                     | 7.2                      | 990.8                                | 227.6         | 711.3             | 0.0                 | 0.0        |
|                             | <b>2017/18</b>    | 9.5                            | 13.3                     | 6.3                      | 1037.9                               | 82.3          | 257.2             | 6.0                 | 8.8        |
|                             | <b>2018/19</b>    | 10.2                           | 13.9                     | 7.2                      | 844.0                                | 139.6         | 436.3             | 7.2                 | 12.1       |
|                             | <b>Historical</b> | 9.6                            | 13.9                     | 5.3                      | 761.8                                | 149.0         | 465.6             | –                   | –          |
| <b>Budbreak to bloom</b>    | <b>2016/17</b>    | 12.3                           | 16.7                     | 8.3                      | 1677.8                               | 144.8         | 452.5             | 14.4                | 14.4       |
|                             | <b>2017/18</b>    | 13.5                           | 18.9                     | 9.2                      | 1818.8                               | 86.7          | 270.9             | 94.6                | 100.6      |
|                             | <b>2018/19</b>    | 12.7                           | 17.6                     | 8.4                      | 1659.9                               | 94.3          | 294.7             | 50.3                | 50.3       |
|                             | <b>Historical</b> | 12.8                           | 17.6                     | 8.0                      | 1453.7                               | 121.8         | 380.6             | –                   | –          |
| <b>Bloom to veraison</b>    | <b>2016/17</b>    | 16.8                           | 22.4                     | 12.1                     | 1544.5                               | 88.3          | 275.9             | 160.5               | 165.8      |
|                             | <b>2017/18</b>    | 17.7                           | 23.2                     | 12.8                     | 1513.5                               | 113.6         | 355.0             | 226.0               | 231.6      |
|                             | <b>2018/19</b>    | 18.1                           | 24.2                     | 13.2                     | 1606.6                               | 36.8          | 115.0             | 261.5               | 260.4      |
|                             | <b>Historical</b> | 17.1                           | 22.3                     | 11.9                     | 1432.0                               | 86.2          | 269.4             | -                   | -          |
| <b>Veraison to harvest</b>  | <b>2016/17</b>    | 15.7                           | 21.2                     | 11.4                     | 1504.3                               | 39.1          | 122.2             | 257.5               | 263.4      |
|                             | <b>2017/18</b>    | 15.3                           | 20.3                     | 11.3                     | 1443.4                               | 117.4         | 366.9             | 252.0               | 257.6      |
|                             | <b>2018/19</b>    | 16.7                           | 22.4                     | 12.2                     | 1087.4                               | 46.8          | 146.3             | 242.3               | 245.3      |
|                             | <b>Historical</b> | 15.7                           | 20.6                     | 10.7                     | 1197.7                               | 104.7         | 327.2             | –                   | –          |
